# Supplementary material
Source: publisher site journal article supplement (https://www.dovepress.com/get_supplementary_file.php?f=504280.docx)
Supplement: Supplementary file 1 [file get_supplementary_file.php]

**Table S1** Summary of literature reported urogenital lesions in mpox patients

| **Urogenital Manifestation and references** | **Case description** | **Key findings** |
| --- | --- | --- |
| **Acute kidney injury (AKI)** |  |  |
| Thornhill et al. [1] | 2of 528 patients had AKI | AKI could be a reason for hospitalization of mpox |
| Higgins et al. [2] | 1 of 11 SOTRs had AKI | AKI may be drug-related |
| **Acute urine retention (AUR)** |  |  |
| Attieh et al. [3] | 1 HIV positive SOTR had AUR | AUR is a potential clinical presentation of mpox patients, possibly linked to immunosuppression |
| Hackett et al. [4] | 1 homosexual man had AUR by penile edema | Mpox-related penile lesions can cause AUR |
| Higgins et al. [2] | 2 of 11 SOTRs had AUR | AUR is a complication of mpox in solid organ transplantation recipients |
| Onukak et al. [5] | 1 female with chickenpox and monkeypox co-infection had AUR | Bacterial infection may be the etiology of AUR |
| **Urethritis** |  |  |
| Liesenborghs et al. [6] | 12 of 155 patients had urethritis | MPXV is potential the pathogen for urethritis. Symptoms of urethritis are not uncommon and sometimes precede skin manifestations |
| Hochedez et al. [7] | 1 male patient presented urethritis and a vesicular rash following a probable heterosexual intercourse | Urethritis can occur after high-risk sexual behavior |
| Angelo et al. [8] | 1 of 193 patients had urethritis as STI co-infection | Streptococcal urethritis can appear in mpox patients |
| Zhao et al. [9] | 4 of 56 patients had urethritis (1 in non-HIV infected group, 3 in HIV-infected group) | Neisseria gonorrhoeae could be the pathogen for urethritis in mpox patients. HIV infection is potentially the risk factor of urethritis. |
| Orviz et al. [10] | 7 of 48 patients had urethritis | Neisseria gonorrhoeae could be the pathogen for urethritis in mpox patients. |
| **Penile lesions (PLs)** |  |  |
| Thornhill et al. [1] | 383 of 528 patients had genital lesions, usually presented vesiculopustular and ulcer | Genital lesions are quite common in mpox and can easily misdiagnosed as other STIs |
| Lee et al. [11] | 68 patients with genital lesions treated by tecovirimat, and 16 of them had significant penile skin changes at final follow-up, which was significantly associated with lesion size | Supportive care, antibiotic treatment for bacterial superinfection, and medical debridement with collagenase for severe lesions are effective managements. |
| Gomez-Garberi et al. [12] | 6 of 14 patients had penile edema. HIV infection, STI, and homosexual behaviors are common. | Genitourinary involvement is frequent in monkeypox disease and is often the reason for the clinics visit. |
| Patel et al. [13] | 111 of 197 patients had genital lesions | Penile edema is a classic clinical presentation of mpox |
| Vicente et al. [14] | 141/181 patients had genital lesions, and 15 of them had penile edema need treatment | The combinations of frequent genital lesions and and the history of sexual exposure suggests close contact is probably the dominant transmission route in the current outbreak |
| Souza et al. [15] | 2280 of 10169 patients had genital lesions, and 489 of them had penile edema | Genital lesions can lead to misdiagnosis of mpox. Laboratory investigation for mpox must be implemented as a priority in STI clinics,especially for MSM. |
| Philpot et al. [16] | Rash was most frequently reported on the genital regions (333/1004) | Genital rash is the most common features of mpox. |
| Angelo et al. [8] | 56 of 187 patients had genital or perianal lesions | Genital or perianal lesions are the common first symptom of mpox. HIV infection is positively related to the higher risk of genital lesions |
| Higgins et al. [2] | 7/11 patients had anogenital lesions | The mpox infection in SOTRs were acquired through sexual contact and the majority presenting with anogenital lesions |
| Zhao et al. [9] | 22/56 patients had genital lesions, usually locates in penile. | Penile occupied the highest portion of skin rash appearance. |
| Wieder-Feinsod et al. [17] | 4/26 patients had penile ulcer | Urogenital lesions are easily misdiagnosed with other STIs |
| Rimmer et al. [18] | 43/70 patients had genital lesions | Genital lesions is an important symptom for mpox screening and diagnosis |
| Orviz et al. [10] | 26 of 48 patients had genital lesions | Genital lesions are usually Vesicular-umbilicated skin lesions |
| Núñez et al. [19] | 171 of 565 patients had genital lesions | HIV infection is a risk factor for genital lesions |
| Mailhe et al. [20] | 135 of 252 patients had rash in genital regions | The bacterial superinfection in genital area can lead to cellulitis and further hospitalization |
| Iñigo Martínez et al. [21] | 359 of 508 patients had rash in anogenital and/or perineal area | MSM is the high risk population of mpox |
| Hoffman et al. [22] | 267 of 535 patients had genital lesions | The clinical picture showed no apparent differences between MSM with or without HIV |
| Girometti et al. [23] | 51 of 54 patients had genital rash | Genital cellulitis is the major reason for hospitalization |
| Fink et al. [24] | 16 of 156 patients had genital lesions | Genital cellulitis, penile edema, and severe penile pain are common reasons for hospitalization |
| Cassir et al. [25] | 68 of 136 patients had genital lesions | Lesion locations largely corresponded with the route of contamination., supporting that mpox is a STI |
| Candela et al. [26] | 59 of 140 patients had genital lesions | Genital lesions are common buy heterogeneous |
| Ciccarese et al. [27] | 14 of 16 patients had genital lesions | Patients with genital rash are vulnerable to severe complications |

**References**

1. Thornhill JP, Barkati S, Walmsley S, Rockstroh J, Antinori A, Harrison LB, et al. Monkeypox Virus Infection in Humans across 16 Countries — April–June 2022. N Engl J Med. 2022;387:679–91.

2. Higgins E, Ranganath N, Mehkri O, Majeed A, Walker J, Spivack S, et al. Clinical features, treatment, and outcomes of mpox in solid organ transplant recipients: A multicenter case series and literature review. American Journal of Transplantation. 2023;23:1972–9.

3. Attieh RM, Brumble L, Elwasila SM, Wadei HM. Disseminated Monkeypox Infection in a Kidney Transplant Recipient: A Case Report. Transplantation Proceedings. 2023;55:667–71.

4. Hackett N, Narayan P, Huf S. Mpox (monkeypox) causing penile lesions and acute urinary retention. BMJ Case Rep. 2023;15:e252696.

5. Onukak AE, Nga CN, Ubani BC, Umoinwek E, Umoette N. Mpox and Chicken Pox Coinfection Complicated by Acute Urinary Retention: A Case Report. West Afr J Med. 2023;40:873–6.

6. Liesenborghs L, Huyst V, Van Dijck C, Rutgers J, De Baetselier I, Kenyon C, et al. Urethritis Without Skin Lesions as the Primary Manifestation of Mpox Virus Infection. European Urology. 2023;83:378–9.

7. Hochedez P, Consigny P-H, Durand A, Buffet P. [A 19-year-old male migrant with urethritis and vesicular rash]. Med Trop Sante Int. 2023;3:mtsi.v3i3.2023.376.

8. Angelo KM, Smith T, Camprubí-Ferrer D, Balerdi-Sarasola L, Díaz Menéndez M, Servera-Negre G, et al. Epidemiological and clinical characteristics of patients with monkeypox in the GeoSentinel Network: a cross-sectional study. Lancet Infect Dis. 2023;23:196–206.

9. Zhao B, Liu Q, Du Q, Kang J, Tang R, Tu Y, et al. Characteristics and Differences in Mpox Patients with and without HIV Infection: A Retrospective Cross-Sectional Study in Chengdu, China. IJGM. 2024;Volume 17:1381–93.

10. Orviz E, Negredo A, Ayerdi O, Vázquez A, Muñoz-Gomez A, Monzón S, et al. Monkeypox outbreak in Madrid (Spain): Clinical and virological aspects. Journal of Infection. 2022;85:412–7.

11. Lee J, McLean J, Zucker J, Brandes S, Joice G. Mpox Genital Lesions: A Large Single-center Experience With Intermediate Follow-up. J Urol. 2023;210:510–6.

12. Gomez-Garberi M, Sarrio-Sanz P, Martinez-Cayuelas L, Delgado-Sanchez E, Bernabeu-Cabezas S, Peris-Garcia J, et al. Genitourinary Lesions Due to Monkeypox. European Urology. 2022;82:625–30.

13. Patel A, Bilinska J, Tam JCH, Da Silva Fontoura D, Mason CY, Daunt A, et al. Clinical features and novel presentations of human monkeypox in a central London centre during the 2022 outbreak: descriptive case series. BMJ. 2022;378:e072410.

14. Tarín-Vicente EJ, Alemany A, Agud-Dios M, Ubals M, Suñer C, Antón A, et al. Clinical presentation and virological assessment of confirmed human monkeypox virus cases in Spain: a prospective observational cohort study. Lancet. 2022;400:661–9.

15. Souza IN de, Pascom ARP, Spinelli MF, Dias GB, Barreira D, Miranda AE. Demographic and clinical characteristics of people diagnosed with active sexually transmitted infections among monkeypox cases in Brazil: the 2022 outbreak. Rev Inst Med Trop Sao Paulo. 2024;66:e20.

16. Philpott D, Hughes CM, Alroy KA, Kerins JL, Pavlick J, Asbel L, et al. Epidemiologic and Clinical Characteristics of Monkeypox Cases - United States, May 17-July 22, 2022. MMWR Morb Mortal Wkly Rep. 2022;71:1018–22.

17. Wieder-Feinsod A, Zilberman T, Erster O, Kolasko GW, Biber A, Gophen R, et al. Overlooked monkeypox cases among men having sex with men during the 2022 outbreak – a retrospective study. International Journal of Infectious Diseases. 2023;128:58–60.

18. Rimmer S, Barnacle J, Gibani MM, Wu M-S, Dissanayake O, Mehta R, et al. The clinical presentation of monkeypox: a retrospective case-control study of patients with possible or probable monkeypox in a West London cohort. International Journal of Infectious Diseases. 2023;126:48–53.

19. Núñez I, García-Grimshaw M, Ceballos-Liceaga SE, Toledo-Salinas C, Carbajal-Sandoval G, Sosa-Laso L, et al. Epidemiological and clinical characteristics of patients with human monkeypox infection in Mexico: a nationwide observational study. The Lancet Regional Health - Americas. 2023;17:100392.

20. Mailhe M, Beaumont A-L, Thy M, Le Pluart D, Perrineau S, Houhou-Fidouh N, et al. Clinical characteristics of ambulatory and hospitalized patients with monkeypox virus infection: an observational cohort study. Clinical Microbiology and Infection. 2023;29:233–9.

21. Iñigo Martínez J, Gil Montalbán E, Jiménez Bueno S, Martín Martínez F, Nieto Juliá A, Sánchez Díaz J, et al. Monkeypox outbreak predominantly affecting men who have sex with men, Madrid, Spain, 26 April to 16 June 2022. Euro Surveill. 2022;27:2200471.

22. Hoffmann C, Jessen H, Wyen C, Grunwald S, Noe S, Teichmann J, et al. Clinical characteristics of monkeypox virus infections among men with and without HIV : A large outbreak cohort in Germany. HIV Medicine. 2023;24:389–97.

23. Girometti N, Byrne R, Bracchi M, Heskin J, McOwan A, Tittle V, et al. Demographic and clinical characteristics of confirmed human monkeypox virus cases in individuals attending a sexual health centre in London, UK: an observational analysis. Lancet Infect Dis. 2022;22:1321–8.

24. Fink DL. Clinical features and management of individuals admitted to hospital with monkeypox and associated complications across the UK: a retrospective cohort study. 2023;23.

25. Cassir N, Cardona F, Tissot-Dupont H, Bruel C, Doudier B, Lahouel S, et al. Observational Cohort Study of Evolving Epidemiologic, Clinical, and Virologic Features of Monkeypox in Southern France. Emerg Infect Dis. 2022;28.

26. Candela C, Raccagni AR, Bruzzesi E, Bertoni C, Rizzo A, Gagliardi G, et al. Human Monkeypox Experience in a Tertiary Level Hospital in Milan, Italy, between May and October 2022: Epidemiological Features and Clinical Characteristics. Viruses. 2023;15:667.

27. Ciccarese G, Di Biagio A, Bruzzone B, Guadagno A, Taramasso L, Oddenino G, et al. Monkeypox outbreak in Genoa, Italy: Clinical, laboratory, histopathologic features, management, and outcome of the infected patients. Journal of Medical Virology. 2023;95:e28560.
